# Supplementary material for: Compositional differences of gut microbiome in matched hormone-sensitive and castration-resistant prostate cancer
Source: PubMed Central journal article supplement — Transl Androl Urol. 2020 Oct;9(5):1937–44. doi: 10.21037/tau-20-566 (PMC7658119; doi:10.21037/tau-20-566), 2020-10
Supplement: tau-09-05-1937-dss.pdf [file tau-09-05-1937-dss.pdf]

## Data Sharing Statement

|                     |                                                                                                                                                    |                                                                                                             |
|---------------------|----------------------------------------------------------------------------------------------------------------------------------------------------|-------------------------------------------------------------------------------------------------------------|
| <b>Article Info</b> | Article Information: <a href="http://dx.doi.org/10.21037/tau-20-566">http://dx.doi.org/10.21037/tau-20-566</a>                                     |                                                                                                             |
| <b>Item</b>         | <b>Question</b>                                                                                                                                    | <b>Authors' Response<br/>(place "-" if not applicable)</b>                                                  |
| 1                   | Would you like to share data collected for your study to others?                                                                                   | Yes.                                                                                                        |
| 2                   | If not, would you like to share the reason for your decision?                                                                                      | -                                                                                                           |
| 3                   | What data in particular will be shared?                                                                                                            | The raw data of 16s rRNA sequencing of patients' gut microbiota.                                            |
| 4                   | Any other documents will be share? Such as study protocol, statistical analysis plan, informed consent form, clinical study report, analytic code. | Statistical analysis, informed consent form, and clinical characteristics will also be shared if requested. |
| 5                   | When will data availability begin?                                                                                                                 | From the publication date.                                                                                  |
| 6                   | When will data availability end?                                                                                                                   | Two years within the publication date.                                                                      |
| 7                   | To whom will you share the data?                                                                                                                   | Open to all.                                                                                                |
| 8                   | For what type of analysis or purpose?                                                                                                              | For analysis to evaluate the role of gut microbiota in PCa progression.                                     |
| 9                   | How or where can the data/documents be obtained?                                                                                                   | Emails could be sent to the address below to obtain the shared data:<br>urologyjhw@163.com.                 |
| 10                  | Any other restrictions?                                                                                                                            | -                                                                                                           |
